# Supplementary material
Source: HighWire-hosted journal article supplement (https://jnm.snmjournals.org/highwire/filestream/95254/field_highwire_adjunct_files/0/187666_Supplemental_Data.pdf)
Supplement: 187666_Supplemental_Data.pdf [file 187666_Supplemental_Data.pdf]

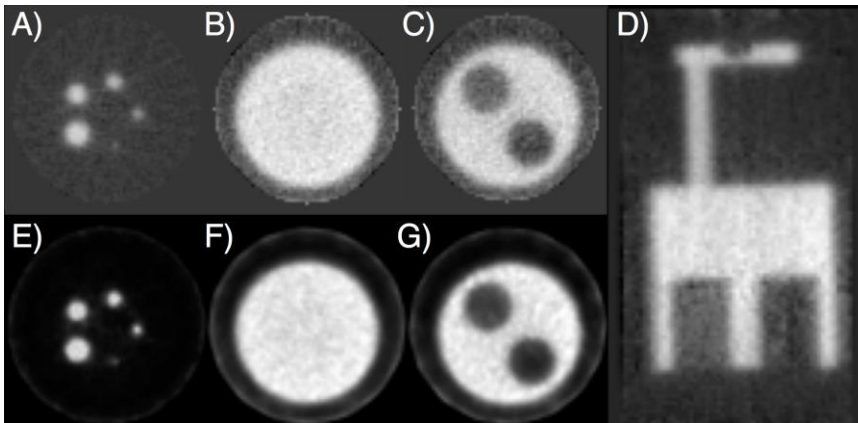

SUPPLEMENTAL FIGURE 1. Reconstructed images of the NEMA NU 4-2008 image quality phantom. Images (a)-(c) show the three sections of the phantom reconstructed with FBP-3DRP, and (e)-(g) reconstructed with PSF-MLEM, all  $42 \times 42 \text{ mm}^2$ . Rod diameters are 1, 2, 3, 4, and 5 mm. Image (d) shows a  $68 \times 42 \text{ mm}^2$  axial section through the stitched-together FBP-3DRP reconstructions.

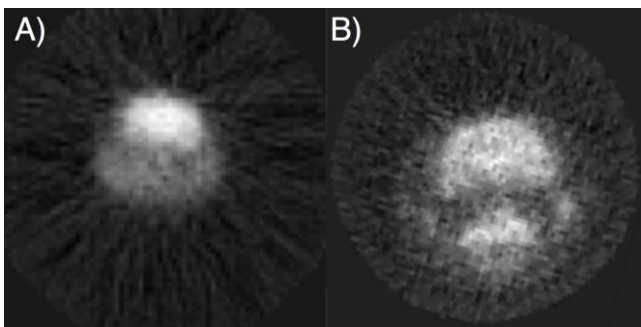

SUPPLEMENTAL FIGURE 2.  $^{18}\text{F}$ -FDG images of a mouse brain (a) and a rat brain (b) reconstructed with FBP-3DRP, both  $42 \times 42 \text{ mm}^2$ .
